# Supplementary material for: Negative impact of penicillin allergy labels on antibiotic use in hospitalized patients in Chinese Mainland
Source: PubMed Central journal article supplement (PMC9428801; doi:10.1016/j.waojou.2022.100677), 2022-08-24
Supplement: mmc1.pdf [file mmc1.pdf]

## Methods

### Antibiotics prescribed in this hospital

#### Beta-lactam:

##### Penicillins:

Penicillinase-resistant penicillins: *oxacillin*

Ampicillins: *amoxicillin, amoxicillin clavulanate potassium, ampicillin*

Anti-pseudomonas penicillins: *piperacillin sulbactam sodium, piperacillin tazobactam sodium*

Benzylpenicillins: *penicillin G, benzathine benzylpenicillin*

##### Cephalosporins:

First-generation cephalosporins: *cefazolin, cefathiamidine*

Second-generation cephalosporins: *cefuroxime, cefaclor, cefprozil*

Third-generation cephalosporins: *cefixime, cefdinir, cefoperazone, ceftriaxone, ceftazidime, cefoperazone sulbactam sodium*

Fourth-generation cephalosporins: *cefepime*

Cephameycins: *cefoxitin, cefmetazole*

##### Other beta-lactams

Monobactams: *aztreonam*

Carbapenems: *imipenem cilastatin sodium, ertapenem, meropenem*

**Aminoglycosides:** *streptomycin, gentamicin, amikacin*

**Macrolides:** *erythromycin, clarithromycin, azithromycin*

**Nitroimidazoles:** *metronidazole, tinidazole*

**Quinolones:** *ciprofloxacin, levofloxacin, moxifloxacin*

**Tetracyclines:** *minocycline*

**Sulfonamides:** *sulfamethoxazole and trimethoprim*

**Other antibiotics:** *clindamycin phosphate, vancomycin, norvancomycin, linezolid, tygacycline*

## Results

Supplemental Table 1. The use of specific antibiotics in penicillin allergy group and control group during hospitalization.

|                                                | Allergy<br>(n=5691) | Control<br>(n=22585) | <i>p</i> -value |
|------------------------------------------------|---------------------|----------------------|-----------------|
| Penicillins, n (%)                             |                     |                      | <0.001*         |
| No                                             | 5278 (92.74)        | 20168 (89.30)        |                 |
| Yes                                            | 413 (7.26)          | 2417 (10.70)         |                 |
| Penicillinase-resistant penicillin (Oxacillin) | 4 (0.07)            | 20 (0.09)            | 0.866           |
| Ampicillins                                    | 31 (0.54)           | 149 (0.66)           | 0.378           |
| Amoxicillin                                    | 13 (0.23)           | 66 (0.29)            | 0.500           |
| Amoxicillin clavulanate potassium              | 18 (0.32)           | 83 (0.37)            | 0.650           |
| Ampicillin                                     | 0 (0.00)            | 0 (0.00)             | 1.000           |
| Anti-pseudomonas penicillins                   | 388 (6.82)          | 2260 (10.01)         | <0.001*         |
| Piperacillin sulbactam sodium                  | 206 (3.62)          | 1320 (5.84)          | <0.001*         |
| Piperacillin tazobactam sodium                 | 193 (3.39)          | 1024 (4.53)          | <0.001*         |
| Benzylpenicillins                              | 4 (0.07)            | 55 (0.24)            | 0.017*          |
| Penicillin G                                   | 0 (0.00)            | 0 (0.00)             | 1.000           |
| Benzathine benzylpenicillin                    | 4 (0.07)            | 55 (0.24)            | 0.017*          |
| Cephalosporins, n (%)                          |                     |                      | <0.001*         |
| No                                             | 4940 (86.80)        | 18642 (82.54)        |                 |
| Yes                                            | 751 (13.20)         | 3943 (17.46)         |                 |
| First-generation cephalosporins                | 301 (5.29)          | 1793 (7.94)          | <0.001*         |
| Cefazolin                                      | 248 (4.36)          | 1427 (6.32)          | <0.001*         |
| Cefathiamidine                                 | 54 (0.95)           | 367 (1.62)           | <0.001*         |
| Second-generation cephalosporins               | 197 (3.46)          | 1085 (4.80)          | <0.001*         |
| Cefuroxime                                     | 125 (2.20)          | 668 (2.96)           | <0.001*         |
| Cefaclor                                       | 74 (1.30)           | 427 (1.89)           | <0.001*         |
| Cefprozil                                      | 0 (0.00)            | 2 (0.01)             | 1.000           |
| Third-generation cephalosporins                | 294 (5.17)          | 1243 (5.50)          | 0.331           |
| Cefixime                                       | 0 (0.00)            | 3 (0.01)             | 1.000           |
| Cefdinir                                       | 0 (0.00)            | 0 (0.00)             | 1.000           |
| Cefoperazone                                   | 0 (0.00)            | 0 (0.00)             | 1.000           |
| Ceftriaxone                                    | 87 (1.53)           | 372 (1.65)           | 0.567           |

|                                            |              |               |         |
|--------------------------------------------|--------------|---------------|---------|
| Ceftazidime                                | 37 (0.65)    | 110 (0.49)    | 0.154   |
| Cefoperazone sulbactam sodium              | 185 (3.25)   | 812 (3.60)    | 0.223   |
| Fourth-generation cephalosporin (cefepime) | 0 (0.00)     | 0 (0.00)      | 1.000   |
| Cephamycins (cefoxitin, cefmetazole)       |              |               | <0.001* |
| No                                         | 5279 (92.76) | 21356 (94.56) |         |
| Yes                                        | 614 (10.79)  | 3661 (16.21)  |         |
| Other $\beta$ -lactams, n (%)              |              |               | <0.001* |
| No                                         | 5279 (92.76) | 21356 (94.56) |         |
| Yes                                        | 412 (7.24)   | 1229 (5.44)   |         |
| Monobactams                                | 103 (1.81)   | 123 (0.54)    | <0.001* |
| Carbapenems                                | 330 (5.80)   | 1125 (4.98)   | 0.014*  |
| Imipenem cilastatin sodium                 | 229 (4.02)   | 814 (3.60)    | 0.144   |
| Ertapenem                                  | 0 (0.00)     | 0 (0.00)      | 1.000   |
| Meropenem                                  | 119 (2.09)   | 392 (1.74)    | 0.081   |
| Aminoglycosides, n (%)                     |              |               | 0.148   |
| No                                         | 5635 (99.02) | 22409 (99.22) |         |
| Yes                                        | 56 (0.98)    | 176 (0.78)    |         |
| Streptomycin                               | 0 (0.00)     | 15 (0.07)     | 0.105   |
| Gentamicin                                 | 7 (0.12)     | 23 (0.10)     | 0.833   |
| Amikacin                                   | 49 (0.86)    | 139 (0.62)    | 0.052   |
| Macrolides, n (%)                          |              |               | <0.001* |
| No                                         | 5657 (99.40) | 22529 (99.75) |         |
| Yes                                        | 34 (0.60)    | 56 (0.25)     |         |
| Erythromycin                               | 16 (0.28)    | 32 (0.14)     | 0.035*  |
| Clarithromycin                             | 8 (0.14)     | 16 (0.07)     | 0.174   |
| Azithromycin                               | 10 (0.18)    | 8 (0.04)      | 0.001*  |
| Quinolones, n (%)                          |              |               | <0.001* |
| No                                         | 4688 (82.38) | 19784 (87.60) |         |
| Yes                                        | 1003 (17.62) | 2801 (12.40)  |         |
| Ciprofloxacin                              | 102 (1.79)   | 325 (1.44)    | 0.058   |
| Levofloxacin                               | 423 (7.43)   | 1031 (4.56)   | <0.001* |
| Moxifloxacin                               | 536 (9.42)   | 1626 (7.20)   | <0.001* |
| Imidazoles, n (%)                          |              |               | 0.096   |

|                                                          |              |               |         |
|----------------------------------------------------------|--------------|---------------|---------|
| No                                                       | 5631 (98.95) | 22401 (99.19) |         |
| Yes                                                      | 60 (1.05)    | 184 (0.81)    |         |
| Metronidazole                                            | 44 (0.77)    | 120 (0.53)    | 0.040*  |
| Tinidazole                                               | 19 (0.33)    | 74 (0.33)     | 1.000   |
| Tetracyclines (minocycline), n (%)                       | 0 (0.00)     | 0 (0.00)      | 1.000   |
| Sulfonamides (Sulfamethoxazole and trimethoprim) , n (%) | 0 (0.00)     | 0 (0.00)      | 1.000   |
| Other antibiotics, n (%)                                 |              |               | <0.001* |
| No                                                       | 4975 (87.42) | 20799 (92.09) |         |
| Yes                                                      | 716 (12.58)  | 1786 (7.91)   |         |
| Clindamycin phosphate                                    | 570 (10.02)  | 1222 (5.41)   | <0.001* |
| Vancomycin                                               | 111 (1.95)   | 396 (1.75)    | 0.344   |
| Norvancomycin                                            | 18 (0.32)    | 65 (0.29)     | 0.827   |
| Linezolid                                                | 28 (0.49)    | 111 (0.49)    | 1.000   |
| Tygacycline                                              | 42 (0.74)    | 190 (0.84)    | 0.490   |

---

Supplemental Table 2. The use of specific antibiotics by female and male patients during hospitalization.

|                                                      | Female              |                      |                 | Male                |                     |                 |
|------------------------------------------------------|---------------------|----------------------|-----------------|---------------------|---------------------|-----------------|
|                                                      | Allergy<br>(n=3354) | Control<br>(n=13312) | <i>p</i> -value | Allergy<br>(n=2337) | Control<br>(n=9273) | <i>p</i> -value |
| Ever used antibiotics during hospitalizations, n (%) | 1570 (46.81)        | 6319 (47.47)         | 0.172           | 1253(53.62)         | 5119(55.20)         | 0.1754          |
| Average duration of antibiotic use, day              | 4.85(10.66)         | 4.64(9.88)           | 0.278           | 6.35(11.77)         | 6.37(12.28)         | 0.940           |
| Penicillins, n (%)                                   |                     |                      | <0.001*         |                     |                     | <0.001*         |
| No                                                   | 3152 (93.98)        | 12,124 (91.08)       |                 | 2126 (90.97)        | 8044 (86.75)        |                 |
| Yes                                                  | 202 (6.02)          | 1188 (8.92)          |                 | 211 (9.03)          | 1229 (13.25)        |                 |
| Penicillinase-resistant penicillin (Oxacillin)       | 3 (0.09)            | 12 (0.09)            | 1.000           | 1 (0.04)            | 8 (0.09)            | 0.796           |
| Ampicillins                                          | 16 (0.48)           | 79 (0.59)            | 0.502           | 15 (0.64)           | 70 (0.75)           | 0.662           |
| Amoxicillin                                          | 5 (0.15)            | 32 (0.24)            | 0.424           | 8 (0.34)            | 34 (0.37)           | 1.000           |
| Amoxicillin clavulanate potassium                    | 11 (0.33)           | 47 (0.35)            | 0.955           | 7 (0.3)             | 36 (0.39)           | 0.660           |
| Ampicillin                                           | 0 (0.00)            | 0 (0.00)             | 1.000           | 0 (0.00)            | 0 (0.00)            | 1.000           |
| Anti-pseudomonas penicillins                         | 189 (5.64)          | 1109 (8.33)          | <0.001*         | 199 (8.52)          | 1151 (12.41)        | <0.001*         |
| Piperacillin sulbactam sodium                        | 102 (3.04)          | 664 (4.99)           | <0.001*         | 104 (4.45)          | 656 (7.07)          | <0.001*         |
| Piperacillin tazobactam sodium                       | 91 (2.71)           | 479 (3.6)            | 0.014*          | 102 (4.36)          | 545 (5.88)          | 0.005*          |
| Benzylpenicillins                                    | 2 (0.06)            | 24 (0.18)            | 0.181           | 2 (0.09)            | 31 (0.33)           | 0.072           |
| Penicillin G                                         | 0 (0.00)            | 0 (0.00)             | 1.000           | 0 (0.00)            | 0 (0.00)            | 1.000           |
| Benzathine benzylpenicillin                          | 2 (0.06)            | 24 (0.18)            | 0.181           | 2 (0.09)            | 31 (0.33)           | 0.072           |
| Cephalosporins, n (%)                                |                     |                      | <0.001*         |                     |                     | <0.001*         |
| No                                                   | 2924 (87.18)        | 11016 (82.75)        |                 | 2016 (86.26)        | 7626 (82.24)        |                 |
| Yes                                                  | 430 (12.82)         | 2296 (17.25)         |                 | 321 (13.74)         | 1647 (17.76)        |                 |
| First-generation cephalosporins                      | 186 (5.55)          | 1096 (8.23)          | <0.001*         | 115 (4.92)          | 697 (7.52)          | <0.001*         |
| Cefazolin                                            | 152 (4.53)          | 871 (6.54)           | <0.001*         | 96 (4.11)           | 556 (6.00)          | <0.001*         |
| Cefathiamidine                                       | 35 (1.04)           | 225 (1.69)           | <0.001*         | 19 (0.81)           | 142 (1.53)          | 0.011*          |
| Second-generation cephalosporins                     | 114 (3.4)           | 660 (4.96)           | <0.001*         | 83 (3.55)           | 425 (4.58)          | 0.034*          |
| Cefuroxime                                           | 79 (2.36)           | 425 (3.19)           | 0.013*          | 46 (1.97)           | 243 (2.62)          | 0.083           |
| Cefaclor                                             | 36 (1.07)           | 240 (1.8)            | <0.001*         | 38 (1.63)           | 187 (2.02)          | 0.254           |
| Cefprozil                                            | 0 (0.00)            | 1 (0.01)             | 1.000           | 0 (0.00)            | 1 (0.01)            | 1.000           |
| Third-generation cephalosporins                      | 154 (4.59)          | 642 (4.82)           | 0.606           | 140 (5.99)          | 601 (6.48)          | 0.412           |
| Cefixime                                             | 0 (0.00)            | 1 (0.01)             | 1.000           | 0 (0.00)            | 2 (0.02)            | 1.000           |
| Cefdinir                                             | 0 (0.00)            | 0 (0.00)             | 1.000           | 0 (0.00)            | 0 (0.00)            | 1.000           |

|                                             |              |               |         |              |              |         |
|---------------------------------------------|--------------|---------------|---------|--------------|--------------|---------|
| Cefoperazone                                | 0 (0.00)     | 0 (0.00)      | 1.000   | 0 (0.00)     | 0 (0.00)     | 1.000   |
| Ceftriaxone                                 | 45 (1.34)    | 221 (1.66)    | 0.216   | 42 (1.8)     | 151 (1.63)   | 0.631   |
| Ceftazidime                                 | 21 (0.63)    | 55 (0.41)     | 0.136   | 16 (0.68)    | 55 (0.59)    | 0.720   |
| Cefoperazone sulbactam sodium               | 93 (2.77)    | 394 (2.96)    | 0.605   | 92 (3.94)    | 418 (4.51)   | 0.251   |
| Fourth-generation cephalosporins (cefepime) | 0 (0.00)     | 0 (0.00)      | 1.000   | 0 (0.00)     | 0 (0.00)     | 1.000   |
| Cephamycins (cefoxitin, cefmetazole)        |              |               | <0.001* |              |              | <0.001* |
| No                                          | 3030 (90.34) | 11356 (85.31) |         | 2047 (87.59) | 7568 (81.61) |         |
| Yes                                         | 324 (9.66)   | 1956 (14.69)  |         | 290 (12.41)  | 1705 (18.39) |         |
| Other $\beta$ -lactams, n (%)               |              |               | <0.001* |              |              | 0.002*  |
| No                                          | 3146 (93.80) | 12717 (95.53) |         | 2133 (91.27) | 8639 (93.16) |         |
| Yes                                         | 208 (6.20)   | 595 (4.47)    |         | 204 (8.73)   | 634 (6.84)   |         |
| Monobactams                                 | 57 (1.70)    | 70 (0.53)     | <0.001* | 46 (1.97)    | 53 (0.57)    | <0.001* |
| Carbapenems                                 | 163 (4.86)   | 538 (4.04)    | 0.039*  | 167 (7.15)   | 587 (6.33)   | 0.167   |
| Imipenem cilastatin sodium                  | 122 (3.64)   | 393 (2.95)    | 0.046*  | 107 (4.58)   | 421 (4.54)   | 0.981   |
| Ertapenem                                   | 0 (0.00)     | 0 (0.00)      | 1.000   | 0 (0.00)     | 0 (0.00)     | 1.000   |
| Meropenem                                   | 50 (1.49)    | 182 (1.37)    | 0.643   | 69 (2.95)    | 210 (2.26)   | 0.062   |
| Aminoglycosides, n (%)                      |              |               | 0.159   |              |              | 0.592   |
| No                                          | 3325 (99.14) | 13229 (99.38) |         | 2310 (98.84) | 9180 (99.00) |         |
| Yes                                         | 29 (0.86)    | 83 (0.62)     |         | 27 (1.16)    | 93 (1.00)    |         |
| Streptomycin                                | 0 (0.00)     | 6 (0.05)      | 0.471   | 0 (0.00)     | 9 (0.10)     | 0.275   |
| Gentamicin                                  | 3 (0.09)     | 10 (0.08)     | 1.000   | 4 (0.17)     | 13 (0.14)    | 0.962   |
| Amikacin                                    | 26 (0.78)    | 67 (0.50)     | 0.078   | 23 (0.98)    | 72 (0.78)    | 0.386   |
| Macrolides, n (%)                           |              |               | 0.003*  |              |              | 0.011*  |
| No                                          | 3333 (99.37) | 13276 (99.73) |         | 2324 (99.44) | 9253 (99.78) |         |
| Yes                                         | 21 (0.63)    | 36 (0.27)     |         | 13 (0.56)    | 20 (0.22)    |         |
| Erythromycin                                | 10 (0.30)    | 19 (0.14)     | 0.089   | 6 (0.26)     | 13 (0.14)    | 0.337   |
| Clarithromycin                              | 5 (0.15)     | 11 (0.08)     | 0.425   | 3 (0.13)     | 5 (0.05)     | 0.433   |
| Azithromycin                                | 6 (0.18)     | 6 (0.05)      | 0.026*  | 4 (0.17)     | 2 (0.02)     | 0.020*  |
| Quinolones, n (%)                           |              |               | <0.001* |              |              | <0.001* |
| No                                          | 2800 (83.48) | 11831 (88.87) |         | 1888 (80.79) | 7953 (85.77) |         |
| Yes                                         | 554 (16.52)  | 1481 (11.13)  |         | 449 (19.21)  | 1320 (14.23) |         |
| Ciprofloxacin                               | 46 (1.37)    | 151 (1.13)    | 0.295   | 56 (2.40)    | 174 (1.88)   | 0.126   |
| Levofloxacin                                | 236 (7.04)   | 569 (4.27)    | <0.001* | 187 (8.00)   | 462 (4.98)   | <0.001* |

|                                                         |              |               |         |               |              |         |
|---------------------------------------------------------|--------------|---------------|---------|---------------|--------------|---------|
| Moxifloxacin                                            | 310 (9.24)   | 857 (6.44)    | <0.001* | 226 (9.67)    | 769 (8.29)   | 0.037*  |
| Imidazoles, n (%)                                       |              |               | 0.454   |               |              | 0.132   |
| No                                                      | 3325 (99.14) | 13216 (99.28) |         | 11491 (98.98) | 2306 (98.67) |         |
| Yes                                                     | 29 (0.86)    | 96 (0.72)     |         | 119 (1.02)    | 31 (1.33)    |         |
| Metronidazole                                           | 20 (0.60)    | 59 (0.44)     | 0.311   | 24 (1.03)     | 61 (0.66)    | 0.083   |
| Tinidazole                                              | 11 (0.33)    | 42 (0.32)     | 1.000   | 8 (0.34)      | 32 (0.35)    | 1.000   |
| Tetracycline (minocycline) , n (%)                      | 0 (0.00)     | 0 (0.00)      | 1.000   | 0 (0.00)      | 0 (0.00)     | 1.000   |
| Sulfonamides (Sulfamethoxazole and trimethoprim), n (%) | 0 (0.00)     | 0 (0.00)      | 1.000   | 0 (0.00)      | 0 (0.00)     | 1.000   |
| Other antibiotics, n (%)                                |              |               | <0.001* |               |              | <0.001* |
| No                                                      | 2949 (87.92) | 12291 (92.33) |         | 2026 (86.69)  | 8508 (91.75) |         |
| Yes                                                     | 405 (12.08)  | 1021 (7.67)   |         | 311 (13.31)   | 765 (8.25)   |         |
| Clindamycin phosphate                                   | 332 (9.90)   | 750 (5.63)    | <0.001* | 238 (10.18)   | 472 (5.09)   | <0.001* |
| Vancomycin                                              | 53 (1.58)    | 188 (1.41)    | 0.517   | 58 (2.48)     | 208 (2.24)   | 0.541   |
| Norvancomycin                                           | 8 (0.24)     | 34 (0.26)     | 1.000   | 10 (0.43)     | 31 (0.33)    | 0.627   |
| Linezolid                                               | 13 (0.39)    | 53 (0.40)     | 1.000   | 15 (0.64)     | 58 (0.63)    | 1.000   |
| Tygacycline                                             | 24 (0.72)    | 87 (0.65)     | 0.783   | 18 (0.77)     | 103 (1.11)   | 0.182   |

Supplemental Table 3. The use of specific antibiotics by different age groups during hospitalization.

|                                                      | Age < 18           |                     |         | 18 ≤ Age < 65       |                      |         | Age ≥ 65            |                     |         |
|------------------------------------------------------|--------------------|---------------------|---------|---------------------|----------------------|---------|---------------------|---------------------|---------|
|                                                      | Allergy<br>(n=311) | Control<br>(n=1182) | p-value | Allergy<br>(n=3467) | Control<br>(n=13980) | p-value | Allergy<br>(n=1913) | Control<br>(n=7423) | p-value |
| Ever used antibiotics during hospitalizations, n (%) | 230 (73.95)        | 858 (72.59)         | 0.682   | 1706 (49.21)        | 6806 (48.68)         | 0.5944  | 887 (46.37)         | 3774 (50.84)        | <0.001  |
| Average duration of antibiotic use, day              | 7.35(12.52)        | 6.15(10.22)         | 0.080   | 5.27(10.71)         | 5.14(11.31)          | 0.553   | 5.52(11.66)         | 5.62(10.39)         | 0.722   |
| Penicillins, n (%)                                   |                    |                     | 0.826   |                     |                      | <0.001* |                     |                     | <0.001* |
| No                                                   | 295 (94.86)        | 1115 (94.33)        |         | 3248 (93.68)        | 12765 (91.31)        |         | 1735 (90.70)        | 6288 (84.71)        |         |
| Yes                                                  | 16 (5.14)          | 67 (5.67)           |         | 219 (6.32)          | 1215 (8.69)          |         | 178 (9.30)          | 1135 (15.29)        |         |
| Penicillinase-resistant penicillin (Oxacillin)       | 1 (0.32)           | 4 (0.34)            | 1.000   | 3 (0.09)            | 11 (0.08)            | 1.000   | 0 (0.00)            | 5 (0.07)            | 0.561   |
| Ampicillins                                          | 0 (0.00)           | 5 (0.42)            | 0.550   | 25 (0.72)           | 100 (0.72)           | 1.000   | 6 (0.31)            | 44 (0.59)           | 0.1883  |
| Amoxicillin                                          | 0 (0.00)           | 1 (0.08)            | 1.000   | 10 (0.29)           | 45 (0.32)            | 0.885   | 3 (0.16)            | 20 (0.27)           | 0.5305  |
| Amoxicillin clavulanate potassium                    | 0 (0.00)           | 4 (0.34)            | 0.586   | 15 (0.43)           | 55 (0.39)            | 0.860   | 3 (0.16)            | 24 (0.32)           | 0.3318  |
| Ampicillin                                           | 0 (0.00)           | 0 (0.00)            | 1.000   | 0 (0.00)            | 0 (0.00)             | 1.000   | 0 (0.00)            | 0 (0.00)            | 1.000   |
| Anti-pseudomonas penicillins                         | 15 (4.82)          | 58 (4.91)           | 1.000   | 201 (5.80)          | 1114 (7.97)          | <0.001* | 172 (8.99)          | 1088 (14.66)        | <0.001* |
| Piperacillin sulbactam sodium                        | 7 (2.25)           | 22 (1.86)           | 0.832   | 103 (2.97)          | 635 (4.54)           | <0.001* | 96 (5.02)           | 663 (8.93)          | <0.001* |
| Piperacillin tazobactam sodium                       | 8 (2.57)           | 38 (3.21)           | 0.690   | 102 (2.94)          | 519 (3.71)           | 0.032*  | 83 (4.34)           | 467 (6.29)          | <0.001* |
| Benzylpenicillins                                    | 0 (0.00)           | 2 (0.17)            | 1.000   | 2 (0.06)            | 34 (0.24)            | 0.051   | 2 (0.1)             | 19 (0.26)           | 0.329   |
| Penicillin G                                         | 0 (0.00)           | 0 (0.00)            | 1.000   | 0 (0.00)            | 0 (0.00)             | 1.000   | 0 (0.00)            | 0 (0.00)            | 1.000   |
| Benzathine benzylpenicillin                          | 0 (0.00)           | 2 (0.17)            | 1.000   | 2 (0.06)            | 34 (0.24)            | 0.0517  | 2 (0.1)             | 19 (0.26)           | 0.329   |
| Cephalosporins, n (%)                                |                    |                     | <0.001* |                     |                      | <0.001* |                     |                     | <0.001* |
| No                                                   | 247 (79.42)        | 818 (69.2)          |         | 304 (87.71)         | 11736 (83.95)        |         | 1652 (86.36)        | 6088 (82.02)        |         |
| Yes                                                  | 64 (20.58)         | 364 (30.8)          |         | 426 (12.29)         | 2244 (16.05)         |         | 261 (13.64)         | 1335 (17.98)        |         |
| First-generation cephalosporins                      | 26 (8.36)          | 194 (16.41)         | <0.001* | 187 (5.39)          | 1101 (7.88)          | <0.001* | 88 (4.6)            | 498 (6.71)          | <0.001* |
| Cefazolin                                            | 23 (7.4)           | 161 (13.62)         | <0.001* | 151 (4.36)          | 846 (6.05)           | <0.001* | 74 (3.87)           | 420 (5.66)          | <0.001* |
| Cefathiamidine                                       | 4 (1.29)           | 33 (2.79)           | 0.189   | 36 (1.04)           | 256 (1.83)           | <0.001* | 14 (0.73)           | 78 (1.05)           | 0.259   |
| Second-generation cephalosporins                     | 20 (6.43)          | 130 (11.00)         | 0.023*  | 113 (3.26)          | 589 (4.21)           | 0.0121* | 64 (3.35)           | 366 (4.93)          | <0.001* |
| Cefuroxime                                           | 13 (4.18)          | 82 (6.94)           | 0.101   | 75 (2.16)           | 363 (2.6)            | 0.1617  | 37 (1.93)           | 223 (3)             | 0.014*  |
| Cefaclor                                             | 8 (2.57)           | 48 (4.06)           | 0.288   | 39 (1.12)           | 232 (1.66)           | 0.0277  | 27 (1.41)           | 147 (1.98)          | 0.1221  |



|                                             |             |              |         |              |               |         |              |              |         |
|---------------------------------------------|-------------|--------------|---------|--------------|---------------|---------|--------------|--------------|---------|
| Cefprozil                                   | 0 (0.00)    | 0 (0.00)     | 1.000   | 0 (0.00)     | 2 (0.01)      | 1.000   | 0 (0.00)     | 0 (0.00)     | 1.000   |
| Third-generation cephalosporins             | 20 (6.43)   | 57 (4.82)    | 0.319   | 149 (4.3)    | 661 (4.73)    | 0.301   | 125 (6.53)   | 525 (7.07)   | 0.439   |
| Cefixime                                    | 0 (0.00)    | 0 (0.00)     | 1.000   | 0 (0.00)     | 0 (0.00)      | 1.000   | 0 (0.00)     | 2 (0.03)     | 1.000   |
| Cefdinir                                    | 0 (0.00)    | 0 (0.00)     | 1.000   | 0 (0.00)     | 0 (0.00)      | 1.000   | 0 (0.00)     | 0 (0.00)     | 1.000   |
| Cefoperazone                                | 0 (0.00)    | 0 (0.00)     | 1.000   | 0 (0.00)     | 0 (0.00)      | 1.000   | 0 (0.00)     | 0 (0.00)     | 1.000   |
| Ceftriaxone                                 | 8 (2.57)    | 24 (2.03)    | 0.714   | 51 (1.47)    | 241 (1.72)    | 0.335   | 28 (1.46)    | 107 (1.44)   | 1.000   |
| Ceftazidime                                 | 2 (0.64)    | 2 (0.17)     | 0.194   | 18 (0.52)    | 63 (0.45)     | 0.695   | 17 (0.89)    | 45 (0.61)    | 0.231   |
| Cefoperazone sulbactam sodium               | 11 (3.54)   | 33 (2.79)    | 0.615   | 87 (2.51)    | 385 (2.75)    | 0.462   | 87 (4.55)    | 394 (5.31)   | 0.200   |
| Fourth-generation cephalosporins (cefepime) | 0 (0.00)    | 0 (0.00)     | 1.000   | 0 (0.00)     | 0 (0.00)      | 1.000   | 0 (0.00)     | 0 (0.00)     | 1.000   |
| Cephamycins (cefoxitin, cefmetazole)        |             |              | <0.001* |              |               | <0.001* |              |              | <0.001* |
| No                                          | 249 (80.06) | 798 (67.51)  |         | 3100 (89.41) | 11724 (83.86) |         | 1728 (90.33) | 6402 (86.25) |         |
| Yes                                         | 62 (19.94)  | 384 (32.49)  |         | 367 (10.59)  | 2256 (16.14)  |         | 185 (9.67)   | 1021(13.75)  |         |
| Other β-lactams, n (%)                      |             |              | <0.001* |              |               | 0.005*  |              |              | 0.013*  |
| No                                          | 266 (85.53) | 1120 (94.75) |         | 3250 (93.74) | 13275 (94.96) |         | 1763 (92.16) | 6961 (93.78) |         |
| Yes                                         | 45 (14.47)  | 62 (5.25)    |         | 217 (6.26)   | 705 (5.04)    |         | 150 (7.84)   | 462 (6.22)   |         |
| Monobactam                                  | 21 (6.75)   | 14 (1.18)    | <0.001* | 57 (1.64)    | 69 (0.49)     | <0.001* | 25 (1.31)    | 40 (0.54)    | 0.001*  |
| Carbapenems                                 | 27 (8.68)   | 51 (4.31)    | 0.003*  | 171 (4.93)   | 645 (4.61)    | 0.453   | 132 (6.90)   | 429 (5.78)   | 0.074   |
| Imipenem cilastatin sodium                  | 15 (4.82)   | 29 (2.45)    | 0.044*  | 123 (3.55)   | 484 (3.46)    | 0.257   | 91 (4.76)    | 301 (4.05)   | 0.193   |
| Ertapenem                                   | 0 (0.00)    | 0 (0.00)     | 1.000   | 0 (0.00)     | 0 (0.00)      | 1.000   | 0 (0.00)     | 0 (0.00)     | 1.000   |
| Meropenem                                   | 14 (4.50)   | 25 (2.12)    | 0.032*  | 57 (1.64)    | 207 (1.48)    | 0.530   | 48 (2.51)    | 160 (2.16)   | 0.397   |
| Aminoglycosides, n (%)                      |             |              | 0.887   |              |               | 0.349   |              |              | 0.154   |
| No                                          | 309 (99.36) | 1171 (99.07) |         | 3430 (98.93) | 13857 (99.12) |         | 1896 (99.11) | 7381 (99.43) |         |
| Yes                                         | 2 (0.64)    | 11 (0.93)    |         | 37 (1.07)    | 123 (0.88)    |         | 17 (0.89)    | 42 (0.57)    |         |
| Streptomycin                                | 0 (0.00)    | 0 (0.00)     | 1.000   | 0 (0.00)     | 14 (0.10)     | 0.126   | 0 (0.00)     | 1 (0.01)     | 1.000   |
| Gentamicin                                  | 0 (0.00)    | 5 (0.42)     | 0.550   | 4 (0.12)     | 11 (0.08)     | 0.737   | 3 (0.16)     | 7 (0.09)     | 0.724   |
| Amikacin                                    | 2 (0.64)    | 6 (0.51)     | 1.000   | 33 (0.95)    | 99 (0.71)     | 0.170   | 14 (0.73)    | 34 (0.46)    | 0.189   |
| Macrolides, n (%)                           |             |              | <0.001* |              |               | 0.005*  |              |              | 1.000   |
| No                                          | 302 (97.11) | 1178 (99.66) |         | 3445 (99.37) | 13939 (99.71) |         | 1910 (99.84) | 7412 (99.85) |         |

|                                                         |             |              |         |              |               |         |              |              |         |
|---------------------------------------------------------|-------------|--------------|---------|--------------|---------------|---------|--------------|--------------|---------|
| Yes                                                     | 9 (2.89)    | 4 (0.34)     |         | 22 (0.63)    | 41 (0.29)     |         | 3 (0.16)     | 11 (0.15)    |         |
| Erythromycin                                            | 5 (1.61)    | 3 (0.25)     | 0.013*  | 10 (0.29)    | 26 (0.19)     | 0.327   | 1 (0.05)     | 3 (0.04)     | 1.000   |
| Clarithromycin                                          | 0 (0.00)    | 1 (0.08)     | 1.000   | 8 (0.23)     | 11 (0.08)     | 0.032*  | 0 (0.00)     | 4 (0.05)     | 0.692   |
| Azithromycin                                            | 4 (1.29)    | 0 (0.00)     | 0.001*  | 4 (0.12)     | 4 (0.03)      | 0.090   | 2 (0.10)     | 4 (0.05)     | 0.784   |
| Quinolones, n (%)                                       |             |              | 0.100   |              |               | <0.001* |              |              | <0.001* |
| No                                                      | 306 (98.39) | 1176 (99.49) |         | 2821 (81.37) | 12203 (87.29) |         | 1561 (81.60) | 6405 (86.29) |         |
| Yes                                                     | 5 (1.61)    | 6 (0.51)     |         | 646 (18.63)  | 1777 (12.71)  |         | 352 (18.40)  | 1018 (13.71) |         |
| Ciprofloxacin                                           | 0 (0.00)    | 1 (0.08)     | 1.000   | 71 (2.05)    | 206 (1.47)    | 0.019*  | 31 (1.62)    | 118 (1.59)   | 1.000   |
| Levofloxacin                                            | 3 (0.96)    | 5 (0.42)     | 0.467   | 298 (8.60)   | 688 (4.92)    | <0.001* | 122 (6.38)   | 338 (4.55)   | 0.001*  |
| Moxifloxacin                                            | 2 (0.64)    | 0 (0.00)     | 0.059   | 317 (9.14)   | 1000 (7.15)   | <0.001* | 217 (11.34)  | 626 (8.43)   | <0.001* |
| Imidazoles, n (%)                                       |             |              | 0.125   |              |               | 0.109   |              |              | 0.461   |
| No                                                      | 296 (95.18) | 1148 (97.12) |         | 3428 (98.88) | 13865 (99.18) |         | 1907 (99.69) | 7388 (99.53) |         |
| Yes                                                     | 15 (4.82)   | 34 (2.88)    |         | 39 (1.12)    | 115 (0.82)    |         | 6 (0.31)     | 35 (0.47)    |         |
| Metronidazole                                           | 13 (4.18)   | 32 (2.71)    | 0.244   | 27 (0.78)    | 67 (0.48)     | 0.043*  | 4 (0.21)     | 21 (0.28)    | 0.757   |
| Tinidazole                                              | 2 (0.64)    | 3 (0.25)     | 0.613   | 15 (0.43)    | 56 (0.40)     | 0.907   | 2 (0.10)     | 15 (0.20)    | 0.554   |
| Tetracycline (minocycline), n (%)                       | 0 (0.00)    | 0 (0.00)     | 1.000   | 0 (0.00)     | 0 (0.00)      | 1.000   | 0 (0.00)     | 0 (0.00)     | 1.000   |
| Sulfonamides (Sulfamethoxazole and trimethoprim), n (%) | 0 (0.00)    | 0 (0.00)     | 1.000   | 0 (0.00)     | 0 (0.00)      | 1.000   | 0 (0.00)     | 0 (0.00)     | 1.000   |
| Other antibiotics, n (%)                                |             |              | <0.001* |              |               | <0.001* |              |              | <0.001* |
| No                                                      | 204 (65.59) | 1000 (84.60) |         | 3007 (86.73) | 12771 (91.35) |         | 1764 (92.21) | 7028 (94.68) |         |
| Yes                                                     | 107 (34.41) | 182 (15.40)  |         | 460 (13.27)  | 1209 (8.65)   |         | 149 (7.79)   | 395 (5.32)   |         |
| Clindamycin phosphate                                   | 94 (30.23)  | 151 (12.77)  | <0.001* | 370 (10.67)  | 840 (6.01)    | <0.001* | 106 (5.54)   | 231 (3.11)   | <0.001* |
| Vancomycin                                              | 16 (5.14)   | 31 (2.62)    | 0.037*  | 72 (2.08)    | 289 (2.07)    | 1.000   | 23 (1.20)    | 76 (1.02)    | 0.579   |
| Norvancomycin                                           | 1 (0.32)    | 4 (0.34)     | 1.000   | 14 (0.40)    | 50 (0.36)     | 0.806   | 3 (0.16)     | 11 (0.15)    | 1.000   |
| Linezolid                                               | 3 (0.96)    | 6 (0.51)     | 0.607   | 17 (0.49)    | 65 (0.46)     | 0.955   | 8 (0.42)     | 40 (0.54)    | 0.632   |
| Tygacycline                                             | 0 (0.00)    | 4 (0.34)     | 0.681   | 21 (0.61)    | 97 (0.69)     | 0.652   | 21 (1.10)    | 89 (1.20)    | 0.805   |
